# Supplementary material
Source: publisher figshare collection journal article supplement (https://tandf.figshare.com/articles/dataset/_/8245895)
Supplement: Supplementary file 1 [file 1]

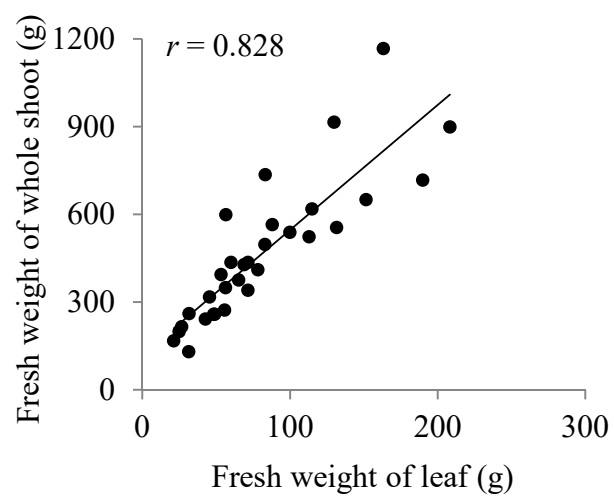

Supplemental Figure 1. Correlation of biomass between leaf and whole shoot of sorghum accessions cultivated in 2011. The linear regression line and the corresponding  $r$  value are shown.
