# Supplementary material
Source: publisher figshare collection journal article supplement (https://tandf.figshare.com/articles/dataset/_/8245895)
Supplement: Supplementary file 2 [file 1]

Archive with 3 entries (3 files):
- tssp_a_1615385_sm0552.pdf
- tssp_a_1615385_sm0551.pdf
- tssp_a_1615385_sm0550.docx
