# Supplementary material
Source: publisher figshare collection journal article supplement (https://tandf.figshare.com/articles/dataset/_/8245895)
Supplement: Supplementary file 2 [file 1 › tssp_a_1615385_sm0550.docx]

Supplemental Table 1. Fresh weight of whole shoot harvested in each year.

| Accession No. | FW (g) | |
| --- | --- | --- |
| 2011 | 2012 |
| 1 | 375 | 1460 |
| 2 | 618 |  |
| 3 | 538 | 570 |
| 4 | 735 |  |
| 5 | 272 | 337 |
| 6 | 915 |  |
| 7 | 650 |  |
| 8 | 348 |  |
| 9 | 522 |  |
| 10 | 410 |  |
| 11 | 497 |  |
| 12 | 435 |  |
| 13 | 258 |  |
| 14 | 258 | 598 |
| 15 | 340 |  |
| 16 | 598 | 837 |
| 17 | 1167 ± 653 | 1190 |
| 18 | 565 | 1067 |
| 19 | 130 |  |
| 20 | 198 |  |
| 21 | 435 | 1847 |
| 22 | 260 |  |
| 23 | 717 |  |
| 24 | 167 |  |
| 25 | 898 | 1685 |
| 26 | 393 | 1693 |
| 27 | 215 |  |
| 28 | 242 | 365 |
| 29 | 428 |  |
| 30 | 555 |  |
| 31 | 317 |  |
| 32 |  | 1625 |
| 33 |  | 600 |
| 34 |  | 415 |
| 35 |  | 727 |
| 36 |  | 1005 |
| 37 |  | 775 |
| 38 |  | 678 |
| 39 |  | 428 |
| 40 |  | 305 |
| 41 |  | 633 |
| 42 |  | 552 |
| 43 |  | 777 |
| 44 |  | 582 |
| 45 |  | 390 |
| 46 |  | 245 |
| 47 |  | 710 |
| 48 |  | 1012 |
| 49 |  | 488 |
| 50 |  | 1198 |
| 51 |  | 478 |
| 52 |  | 832 |
| 53 |  | 415 |
| 54 |  | 1153 |
| 55 |  | 515 |
| 56 |  | 1183 |

The accession No. corresponds to the accessions in Table 1.
