# Supplementary material
Source: publisher figshare collection journal article supplement (https://tandf.figshare.com/articles/dataset/_/8245895)
Supplement: Supplementary file 2 [file 1 › tssp_a_1615385_sm0552.pdf]

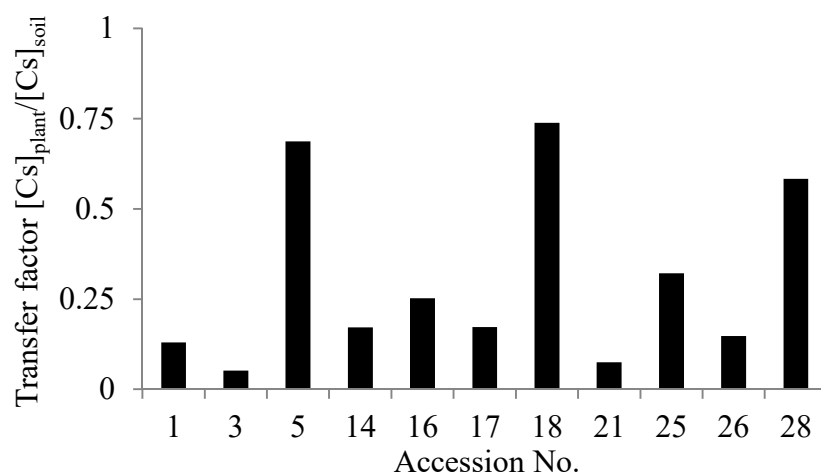

Supplemental Figure 2. Soil-to-plant transfer factors of radioactive Cs among 11 sorghum accessions cultivated in 2012.  $[Cs]_{\text{plant}}$  and  $[Cs]_{\text{soil}}$  indicate total activity concentration of radioactive  $^{134}\text{Cs}$  +  $^{137}\text{Cs}$  in leaf and soil, respectively. The numbers on the x axis correspond to the accessions in Table 1. The accessions in this figure are the same as those in Figure 4.
